# Supplementary material for: The Genomic Basis of Color Pattern Polymorphism in the Harlequin Ladybird
Source: PubMed Central journal article supplement — Curr Biol. 2018 Oct 22;28(20):3296–3302.e7. doi: 10.1016/j.cub.2018.08.023 (PMC6203698; doi:10.1016/j.cub.2018.08.023), 2018-10-22
Supplement: mmc1.pdf [file mmc1.pdf]

**Current Biology, Volume 28**

## **Supplemental Information**

### **The Genomic Basis of Color Pattern**

#### **Polymorphism in the Harlequin Ladybird**

**Mathieu Gautier, Junichi Yamaguchi, Julien Foucaud, Anne Loiseau, Aurélien Ausset, Benoit Facon, Bernhard Gschloessl, Jacques Lagnel, Etienne Loire, Hugues Parrinello, Dany Severac, Celine Lopez-Roques, Cecile Donnadiou, Maxime Manno, Helene Berges, Karim Gharbi, Lori Lawson-Handley, Lian-Sheng Zang, Heiko Vogel, Arnaud Estoup, and Benjamin Prud'homme**

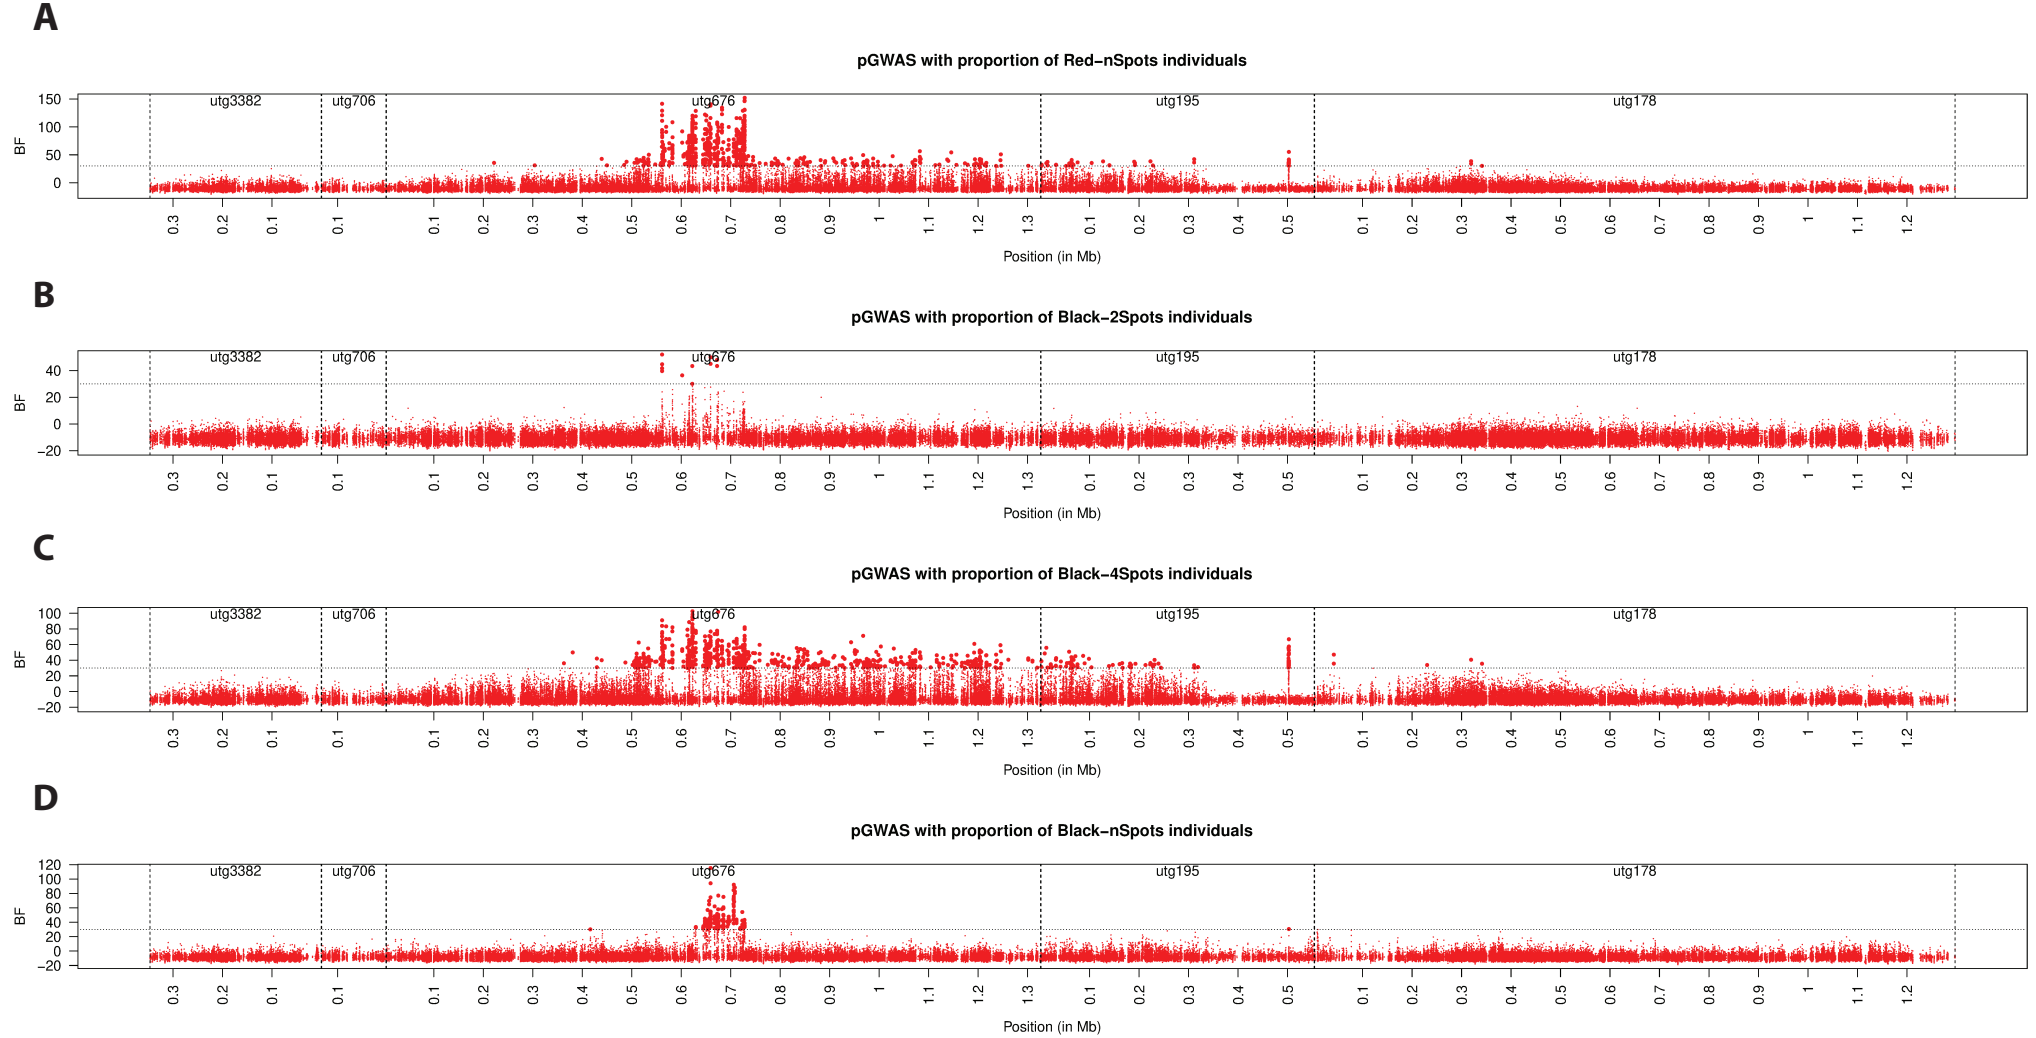

**Figure S1. Genome-wide association study focusing on the color pattern genomic region of the *HaxR* assembly. Related to Figure 1.**  
 (A) Association with the proportion of Red-nSpots individuals. (B) Association with the proportion of Black-2Spots individuals.  
 (C) Association with the proportion of Black-4Spots individuals. (D) Association with the proportion of Black-nSpots individuals.



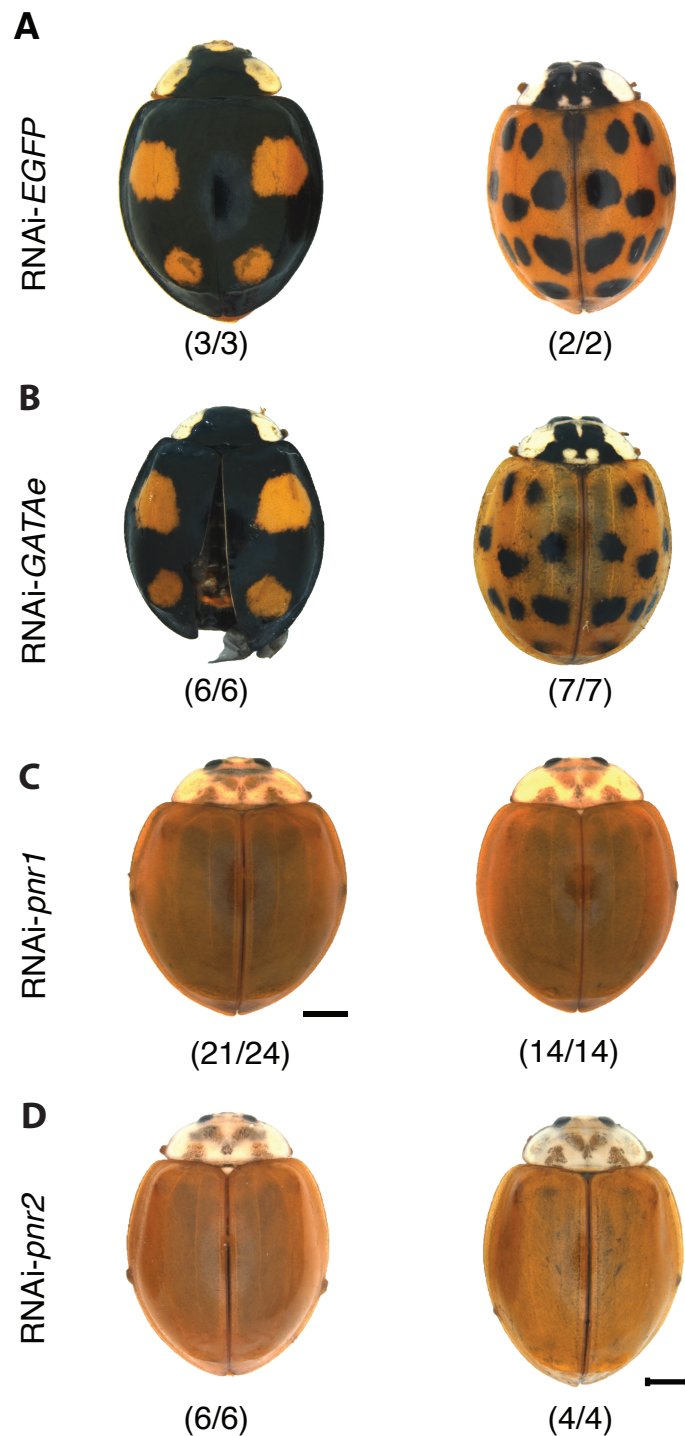

**Figure S2. *pannier*, but not *GATAe*, is necessary for adult pigmentation patterns. Related to Figure 2; Figure S3.**

(A-D) RNAi phenotypes after larval injection of dsRNA in Black-4Spots (left column) or Red-nSpots (right column). (A) dsRNA targeting *eGFP* (negative control). (B) dsRNA targeting *GATAe*. (C) dsRNA targeting *pnr\_1* region. (D) dsRNA targeting *pnr\_2* region. *pnr\_1* and *pnr\_2* are non-overlapping regions of the *pannier* cDNA. Numbers in parentheses indicate the proportion of eclosed adults showing the pigmentation pattern of the representative individual. Scale bar; 1mm.

**A**

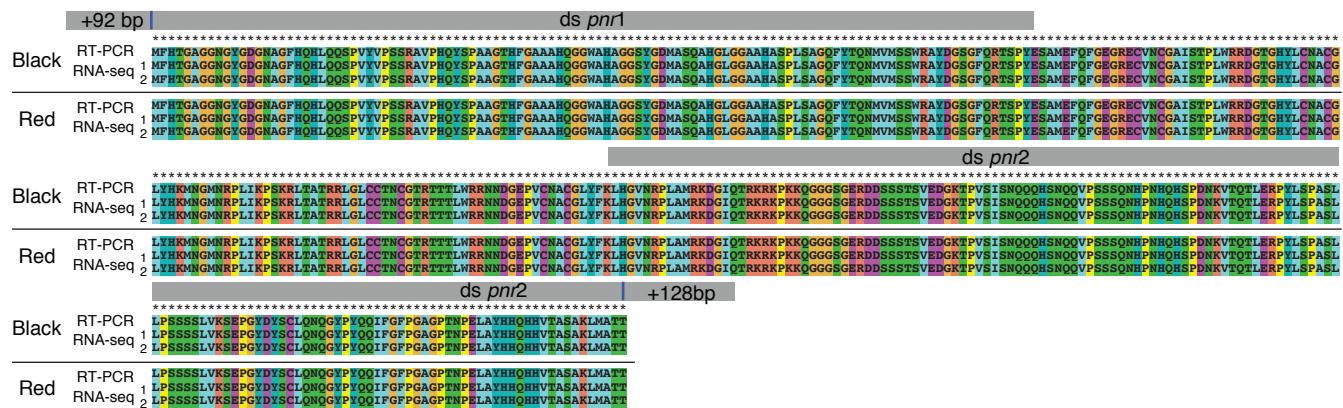

**B**

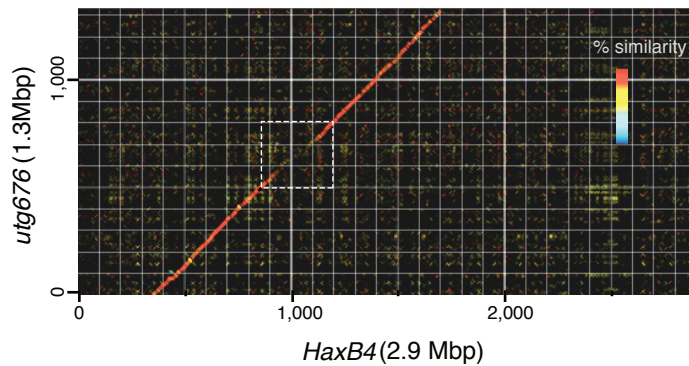

**C**

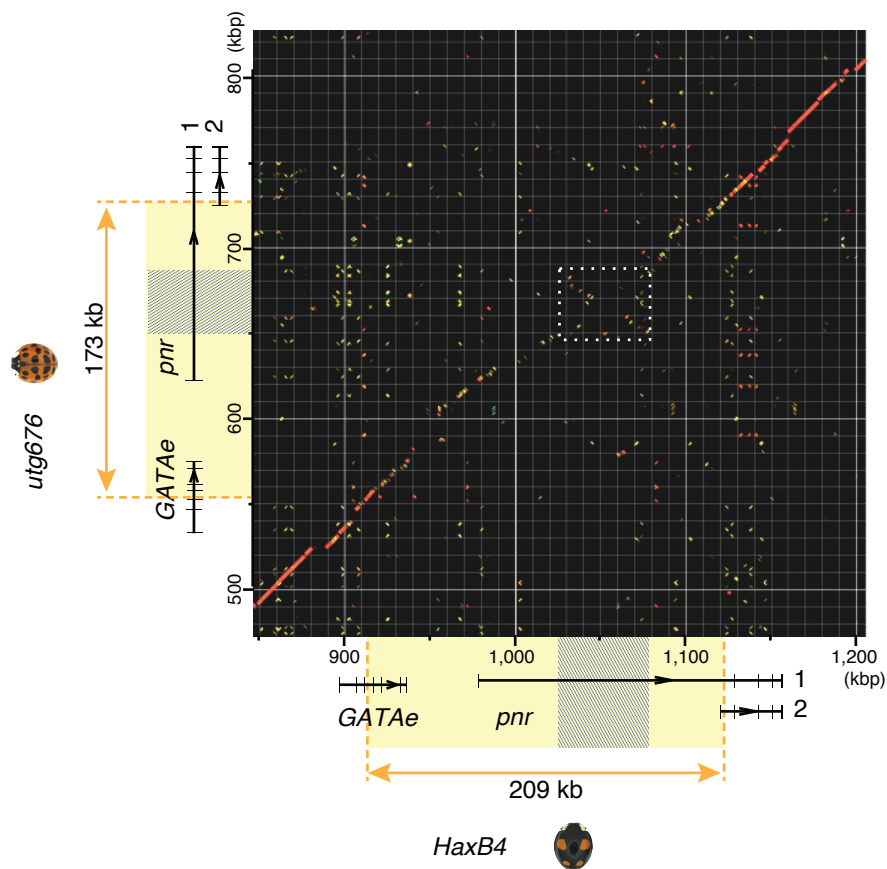

**Figure S3. Comparison of Pannier sequences and *utg676* and *HaxB4* sequences. Related to Figure 1; Figure 2; Figure S2.**

(A) Alignment of Pannier sequences, resulting from conceptual translation of cDNA obtained by RT-PCR or by mapping two independent RNA-seq reads from Black-4Spots or Red-nSpots individuals. Asterisks indicate conserved amino acids. The positions of the two fragments amplified for dsRNAs (*ds\_pnr1* and *ds\_pnr2*) are shown in grey. (B) Dot-plot between genomic scaffolds from the Black-4Spots (assembly *HaxB4*) and Red-nSpots (assembly *HaxR*, contig *utg676*) forms. The most divergent sequence (white dashed box in B) is shown at a higher magnification in C). (C) Traces of a sequence inversion are visible in the divergent region (white dashed box).

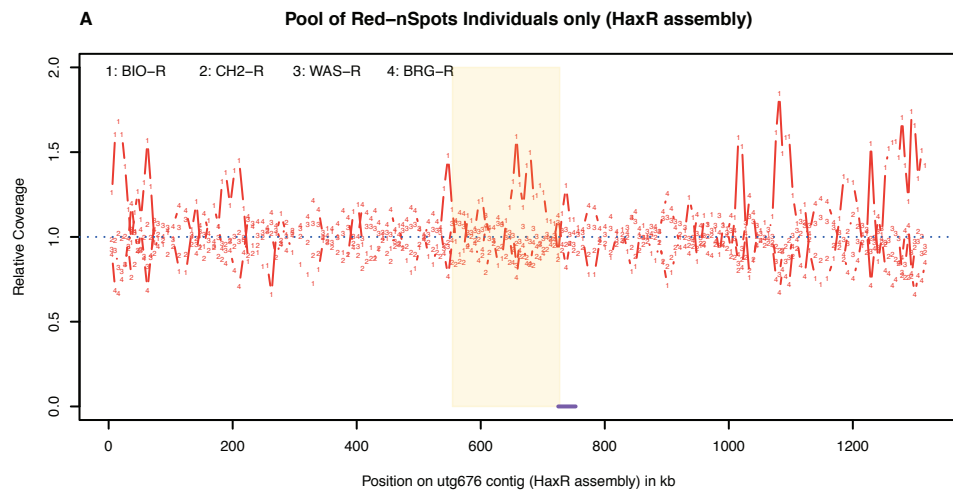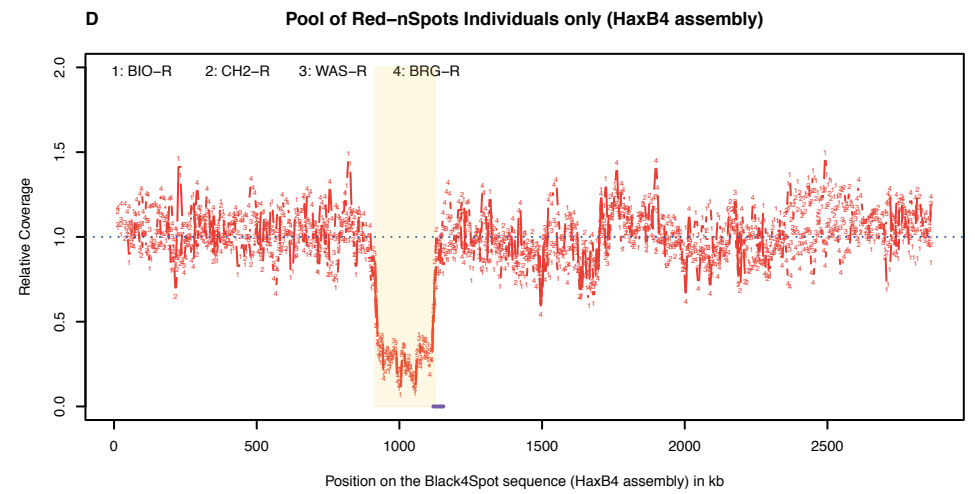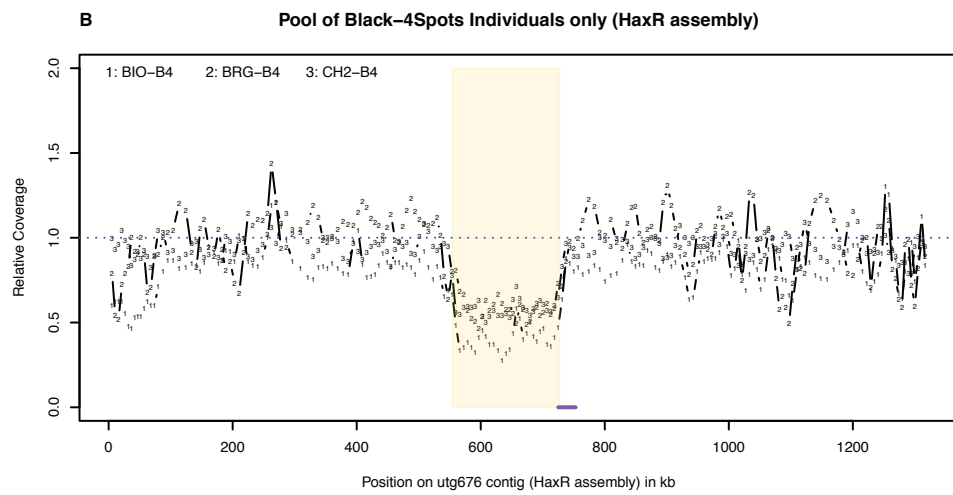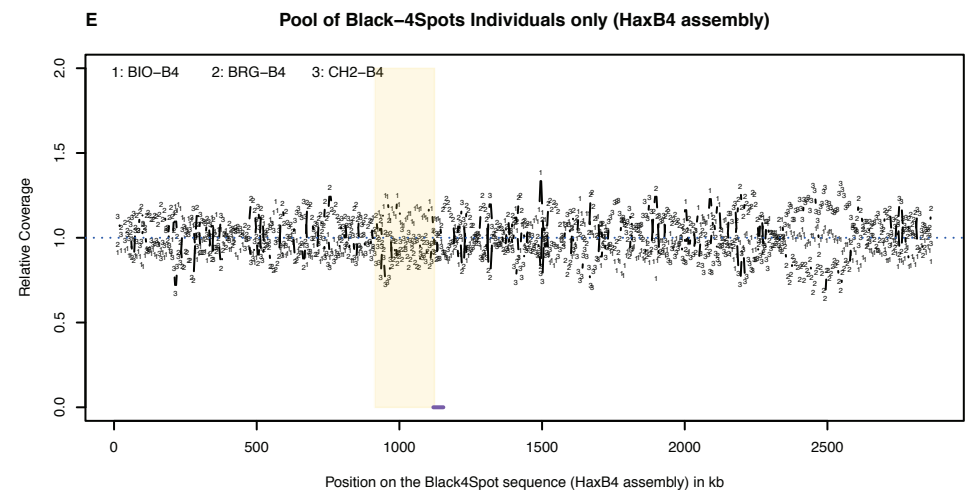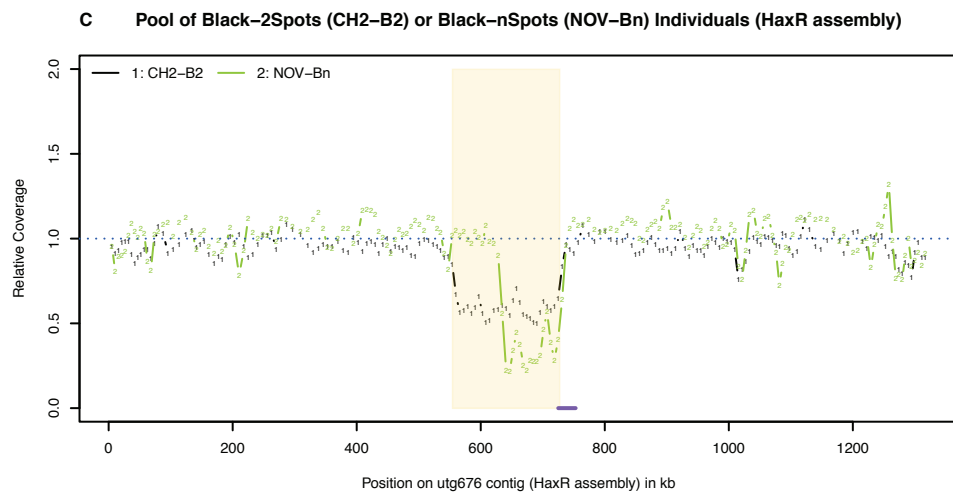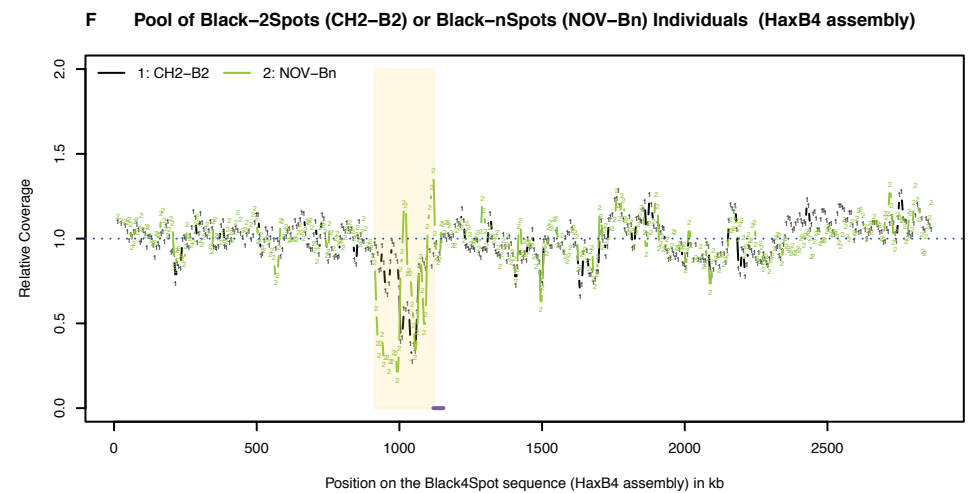

**Figure S4. Relative read mapping coverage for window of 10,000 positions. Related to STAR Methods.**

(A-C) relative read mapping coverage over the extended Red-nSpots (*HaxR* assembly), and (D-F) relative read mapping coverage over the Black-4Spots allele sequence (*HaxB4* assembly) for i) the four pools including Red-nSpots individuals only (A, D); ii) the three pools including Black-4Spots individuals only (B, E); and iii) the CH2-B2 and NOV-Bn pools including respectively Black-2Spots individuals only and Black-nSpots individuals only (C, F). The horizontal blue dotted line gives the value of 1 expected for the absence of departure in the relative coverage. The genomic region where the sequences of the Red-nSpots and Black-4Spots alleles diverge is represented as a shaded orange area. A purple line represents the position of the gene *pannier*. As expected, no obvious departure of the relative window coverage (from the expected value of 1) was observed over the entire Red-nSpots *utg676* contig for the four pools including Red-nSpots individuals only, although the BIO-R pools displayed several regions with high relative coverage values (A). In contrast, for the three pools including Black-4Spots individuals only, we found that the relative window coverage was almost halved in the ca. 170 kb region upstream *pannier*, with slight pattern differences likely explained by the pool frequency of heterozygous individuals carrying a Red-nSpots allele (B). When considering the extended Black-4Spots allele sequence as a reference (assembly *HaxB4*), the pattern was reverted: no obvious departure of the relative window coverage was observed for Black-4Spots pools (E) and the coverage was almost halved for Red-nSpots pools in the genomic region harbouring strong sequence divergence between the two color pattern form alleles (D). For the CH2-B2 pool including Black-2Spots individuals only, we observed a clear reduction in relative coverage over the entire genomic region where the sequences of the Red-nSpots and Black-4Spots alleles diverge on the *HaxR* assembly (C). Interestingly, the reduction in relative coverage concerned a more restricted region (located closer to *pannier*) on the *HaxB4* assembly (F). This suggests that the Black-2Spots allele might be more similar to the Black-4Spots allele, over at least a part of the upstream region of *pannier*, although it should be kept in mind that additional large scale variation (insertion or deletion) specific to the Black-2Spots allele are not identifiable with this approach. Finally, for the NOV-Bn pool including Black-nSpots individuals only, we observed a clear reduction in relative coverage over the second half of the region where the sequences of the Red-nSpots and Black-4Spots alleles diverge on the *HaxR* assembly (C). This pattern suggests a close similarity in sequence of the Black-nSpots allele with the Red-nSpots allele over the first half of its sequence. On the *HaxB4* assembly we also observed a clear reduction of the NOV-Bn relative coverage over the first half of the region where the sequences of the Red-nSpots and Black-4Spots alleles diverge, whereas coverage reduction was less obvious in the second half of the region (F). This suggests some sequence similarity between the Black-nSpots and the Black-4Spots allele in the latter genomic region. It is worth noting, however, that for the Black-nSpots allele too, additional specific large-scale variations (insertion or deletion) are not identifiable with this approach.

|                      | Assembly <i>HaxR</i>                                | Assembly <i>HaxB4</i>                              |
|----------------------|-----------------------------------------------------|----------------------------------------------------|
| Data                 | MinION long reads (65X)<br>Illumina PE reads (100X) | Illumina PE reads (65X)<br>Illumina MP reads (24X) |
| Assembler            | SMARTdenovo                                         | ALLPATH-LG                                         |
| Nb. of sequences     | 1,071 contigs                                       | 6,586 scaffolds                                    |
| Total length (Mbp)   | 429                                                 | 393.1                                              |
| Average length (Kbp) | 400.9                                               | 59.7                                               |
| Max size (Kbp)       | 7,499                                               | 5,635                                              |
| Total Ns (bp)        | 22                                                  | 22,814,986                                         |
| N50 (Kbp)            | 1,434                                               | 978.4                                              |
| BUSCO (complete)     | 97.2 %                                              | 86.0 %                                             |
| BUSCO (fragmented)   | 1.3 %                                               | 8.7 %                                              |
| BUSCO (missing)      | 1.5 %                                               | 5.3 %                                              |

**Table S1 Statistics characterizing the *HaxR* assembly obtained from Red-nSpots individuals and the *HaxB4* assembly obtained from Black-4Spots individuals. Related to STAR Methods.**  
More details can be found in DataS1.

| Pooled-sequencing sample code | Population sampling site |                                        | Sampling year | Colour form in the pool                   | No. of sequenced individuals |
|-------------------------------|--------------------------|----------------------------------------|---------------|-------------------------------------------|------------------------------|
|                               | Country                  | Region or city                         |               |                                           |                              |
| CH1-R                         | China                    | Jilin                                  | 2013          | Red-nSpots only                           | 100                          |
| CH1-B                         |                          |                                        |               | 30 Black-4Spots<br>28 <b>Black-2Spots</b> | 58                           |
| CH2-R                         | China                    | Changchun                              | 2015          | Red-nSpots only                           | 100                          |
| CH2-B4                        |                          |                                        |               | Black-4Spots only                         | 67                           |
| CH2-B2                        |                          |                                        |               | <b>Black-2Spots only</b>                  | 73                           |
| JP-R                          | Japan                    | Kyoto and other cities                 | 2009          | Red-nSpots only                           | 57                           |
| JP-B4                         |                          |                                        |               | Black-4Spots only                         | 58                           |
| NOV-Bn                        | Russia                   | Novosibirsk                            | 2007          | Black-nSpots only                         | 44                           |
| BRG-R                         | France                   | Bourgogne                              | 2013          | Red-nSpots only                           | 50                           |
| BRG-B4                        |                          |                                        |               | Black-4Spots only                         | 50                           |
| ENA-R                         | USA                      | Georgia                                | 2007          | Red-nSpots only                           | 45                           |
| WAS-R                         | USA                      | Washington                             | 2007          | Red-nSpots only                           | 40                           |
| BIO-R                         | France                   | Biological control population (BIOTOP) | 2012          | Red-nSpots only                           | 100                          |
| BIO-B4                        |                          |                                        |               | Black-4Spots only                         | 100                          |

**Table S2 Sequenced pools of individuals representative of the world-wide diversity and the four main color pattern forms of *H. axyridis*. Related to STAR Methods.**

The colour pattern forms **Red-nSpot**, Black-nSpots, Black-4Spots and **Black-2Spots** correspond to the forms *f. succinea*, *f. axyridis*, *f. conspicua*, and *f. spectabilis*, respectively. Because of the hierarchical dominance between color form alleles (i.e. Black-2Spots > Black-4Spots > Black-nSpots > Red-nspot), a population pool sample including individuals of a single colour pattern form is characterized by a high proportion of the allele associated to that form but also contains alleles associated to other more recessive forms if present in the population. Only population pool samples with Red-nSpots individuals contain 100% of Red-nSpots alleles.
